# Supplementary material for: Work function modification of the (111) gold surface covered by long alkanethiol-based self-assembled monolayers
Source: Royal Society of Chemistry journal article supplement (doi:10.1039/c3cp54217c), 2013-11-28
Supplement: c3cp54217c.pdf [file c3cp54217c.pdf]

Supporting Information for

Work Function Modification of the (111) Gold Surface Covered by  
Long Alkanethiol-Based Self-Assembled Monolayers

Silvio Osella, David Cornil, and Jérôme Cornil

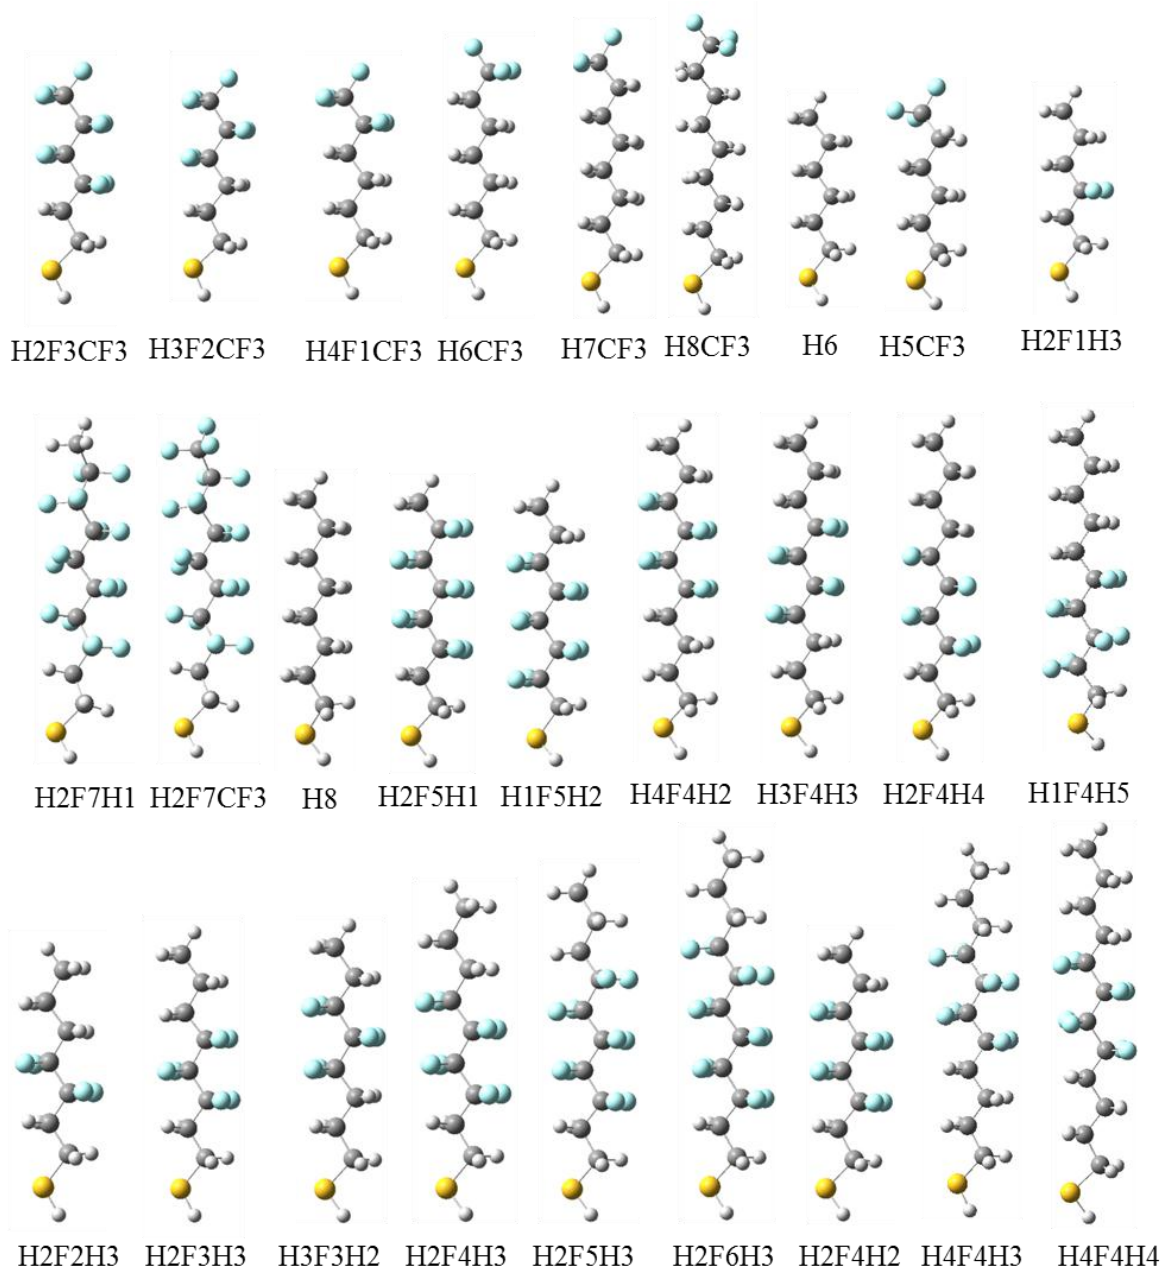

**Figure S1.** Chemical structures of the neutral alkanethiols under study. The colors refer to the following atoms: white → hydrogen, grey → carbon, yellow → sulphur and pale blue → fluorine.

|                |      |        |        |         |        |        |
|----------------|------|--------|--------|---------|--------|--------|
| LDA            | H6   | H2F3H3 | H2F4H3 | H2F7CF3 | H3F4H3 | H4F4H2 |
| $\alpha$ -tilt | 15.4 | 11     | 18.1   | 9.8     | 7.3    | 7.6    |
| $\beta$ -twist | 27   | 19.8   | 9.5    | 86.2    | 33     | 37.7   |
| VDW            | H6   | H2F3H3 | H2F4H3 | H2F7CF3 | H3F4H3 | H4F4H2 |
| $\alpha$ -tilt | 15.3 | 10.8   | 17.5   | 9.6     | 7      | 7.5    |
| $\beta$ -twist | 30.4 | 21.9   | 10.3   | 86.7    | 30     | 37     |

**Table 1.** Geometrical parameters calculated for selected molecules with two different functionals. The top part of the table reports data obtained with LDA functional, while the second half yields the results with explicit vdW interactions treated within the Grimme approach.

|                | H6   | H5CF3 | H2F7H1 | H2F7CF3 | H8   | H2F5H1 | H1F5H2 |
|----------------|------|-------|--------|---------|------|--------|--------|
| $\alpha$ -tilt | 15.4 | 26.5  | 9.8    | 9.8     | 11.6 | 10.7   | 12.8   |
| $\beta$ -twist | 27   | 25.8  | 84.9   | 86.2    | 46.7 | 20.3   | 13.8   |

|                | H6CF3 | H7CF3 | H8CF3 | H2F3CF3 | H3F2CF3 | H4F1CF3 |
|----------------|-------|-------|-------|---------|---------|---------|
| $\alpha$ -tilt | 24.35 | 11.1  | 18.72 | 13.15   | 13.22   | 14.5    |
| $\beta$ -twist | 12.23 | 24.2  | 4.13  | 20.3    | 18.64   | 20.33   |

|                | H4F4H2 | H3F4H3 | H2F4H4 | H1F4H5 | H2F1H3 | H2F2H3 | H2F3H3 |
|----------------|--------|--------|--------|--------|--------|--------|--------|
| $\alpha$ -tilt | 7.6    | 7.3    | 7.6    | 7.5    | 12.8   | 24.3   | 11     |
| $\beta$ -twist | 37.7   | 33     | 37.3   | 35.1   | 20.2   | 14.3   | 19.8   |

|                | H3F3H2 | H2F4H3 | H2F5H3 | H2F6H3 | H2F4H2 | H4F4H3 | H4F4H4 |
|----------------|--------|--------|--------|--------|--------|--------|--------|
| $\alpha$ -tilt | 11.2   | 18.1   | 10.1   | 13.4   | 11.1   | 13.3   | 13     |
| $\beta$ -twist | 6.2    | 9.5    | 3      | 4.5    | 18.7   | 6      | 0.3    |

**Table 2.** Geometrical parameters calculated for all molecules analyzed in the paper, as obtained at the LDA level.
